# Supplementary material for: Elevated TERT Expression in TERT-Wildtype Adult Diffuse Gliomas: Histological Evaluation with a Novel TERT-Specific Antibody
Source: Biomed Res Int. 2018 Mar 5;2018:7945845. doi: 10.1155/2018/7945845 (PMC5859900; doi:10.1155/2018/7945845)
Supplement: Supplementary Table 1 — Detailed information of the cases. [file 7945845.f1.xlsx]

## Sheet: Suppl Table 1
Supplementary Table 1: Detailed information of the cases.
Case No	Age/Sex	Histology	WHO	IDH1(R132H)	IDH1	IDH2	p53	ATRX	1p/19q-codel	TERT mut		(SNP)	TERT IHC
			grading	(IHC)	(Seq)	(Seq)	(IHC)	(IHC)	(FISH)	C228T	C250T	T349C	scoring
Astrocytic with mtIDH (DA/AA)
A_1	62/F	AA	III	+	N/A	N/A	+	-	-	-	-	+	1
A_2	24/M	DA	II	+	N/A	N/A	+	-	-	-	-	-	1
A_3	56/M	AA	III	+	N/A	N/A	+	-	-	-	-	-	2
A_4	38/F	AA	III	+	N/A	N/A	+	-	-	-	-	+	1
A_5	29/F	AA	III	+	N/A	N/A	-	-	-	-	-	+	3
A_6	35/F	AA	III	+	N/A	N/A	-	-	-	-	-	-	2
A_7	37/F	AA	III	+	N/A	N/A	+	-	-	-	-	+	2
A_8	28/F	AA	III	+	N/A	N/A	+	-	-	-	-	+	2
A_9	39/M	AA	III	+	N/A	N/A	+	-	-	-	-	+	1
A_10	30/F	AA	III	+	N/A	N/A	+	-	-	-	-	-	1
A_11	45/M	AA	III	+	N/A	N/A	-	-	-	-	-	-	3
Oligodendroglial
O_1	34/M	OL	II	+	N/A	N/A	-	+	+	-	+	-	1
O_2	56/M	AO	III	+	N/A	N/A	-	+	+	-	+	-	3
O_3	42/F	OL	II	+	N/A	N/A	-	+	+	+	-	-	1
O_4	29/M	OL	II	+	N/A	N/A	-	+	+	+	-	+	2
O_5	39/F	OL	II	+	N/A	N/A	-	+	+	+	-	+	2
O_6	27/M	AO	III	+	N/A	N/A	-	+	+	-	+	-	2
O_7	41/F	OL	II	+	N/A	N/A	-	+	+	+	-	-	1
O_8	35/M	AOA	III	+	N/A	N/A	-	+	+	+	-	-	2
O_9	42/F	AOA	III	+	N/A	N/A	-	+	+	+	-	-	1
O_10	39/F	AO	III	+	N/A	N/A	-	+	+	+	-	+	3
IDH-wildtype GBM
GBM_1	62/F	GBM	IV	-	WT	WT	-	+	-	+	-	+	2
GBM_2	74/F	GBM	IV	-	WT	WT	+	+	-	+	-	+	3
GBM_3	69/F	GBM	IV	-	WT	WT	-	+	-	-	+	+	2
GBM_4	74/M	GBM	IV	-	WT	WT	-	+	-	-	+	+	2
GBM_5	78/M	GBM	IV	-	WT	WT	-	+	-	-	-	+	2
GBM_6	56/F	GBM	IV	-	WT	WT	-	+	-	-	-	+	3
GBM_7	58/F	GBM	IV	-	WT	WT	-	+	-	-	-	+	1
GBM_8	51/M	GBM	IV	-	WT	WT	+	+	-	+	-	+	3
GBM_9	61/M	GBM	IV	-	WT	WT	-	+	-	+	-	-	3
GBM_10	70/F	GBM	IV	-	WT	WT	-	+	-	-	-	+	1
GBM_11	67/M	GBM	IV	-	WT	WT	+	+	-	+	-	+	2
IDH-wildtype DA
IDHwt_1	69/F	AA	III	-	WT	WT	-	+	-	-	-	+	2
IDHwt_2	75/M	AA	III	-	WT	WT	-	+	-	+	-	-	1
IDHwt_3	58/M	DA	II	-	WT	WT	-	+	-	-	-	-	1
IDHwt_4	58/M	AA	III	-	WT	WT	-	+	-	+	-	-	2
IDHwt_5	66/M	AOA	III	-	WT	WT	-	+	-	+	-	-	3
IDHwt_6	41/M	AOA	III	-	WT	WT	-	+	-	-	-	-	2
IDHwt_7	51/M	AA	III	-	WT	WT	-	+	-	-	-	+	2
IDHwt_8	46/F	AOA	III	-	WT	WT	-	+	-	-	-	+	2
IDHwt_9	54/F	OA	II	-	WT	WT	-	+	-	-	+	-	3
AA, anaplastic astrocytoma; AO, anaplastic oligodendroglioma; AOA, anaplastic oligoastrocytoma; codel, codeletion; DA, diffuse astrocytoma; FISH, fluorescence in situ hybridization;
GBM, glioblastoma; IHC, immunohistochemistry; mut, mutation; N/A, not available; OA, oligoastrocytoma; OL, oligdendroglioma; seq, sequencing; WT, wild type.
