# Supplementary material for: Elevated TERT Expression in TERT-Wildtype Adult Diffuse Gliomas: Histological Evaluation with a Novel TERT-Specific Antibody
Source: Biomed Res Int. 2018 Mar 5;2018:7945845. doi: 10.1155/2018/7945845 (PMC5859900; doi:10.1155/2018/7945845)
Supplement: Supplementary Table 2 — Primer information. [file 7945845.f2.xlsx]

## Sheet: Suppl Table 2
Supplementary Table 2: Primer information.
TERT (for mutation)	Forward	5'	TCCCTCGGGTTACCCCACAG	3'
	Reverse	5'	AAAGGAAGGGGAGGGGCTG	3'
IDH1	Forward	5'	CGGTCTTCAGAGAAGCCATT	3'
	Reverse	5'	CACATTATTGCCAACATGAC	3'
IDH2	Forward	5'	GCTGCAGTGGGACCACTATT	3'
	Reverse	5'	TGTGGCCTTGTACTGCAGAG	3'
TERT (for qRT-PCR) #1	Forward	5'	GCCTGAGCTGTACTTTGTC	3'
	Reverse	5'	CGTGTTCTGGGGTTTGATG	3'
TERT (for qRT-PCR) #2	Forward	5'	GAGAACAAGCTGTTTGCGGG	3'
	Reverse	5'	AGCCATACTCAGGGACACCT	3'
β-actin	Forward	5'	GTCATTCCAAATATGAGATGCGTTG	3'
	Reverse	5'	TGTGTGGACTTGGGAGGA	3'
